# Supplementary material for: Predicting incident heart failure from population-based nationwide electronic health records: protocol for a model development and validation study
Source: PubMed Central journal article supplement — BMJ Open. 2024 Jan 22;14(1):e073455. doi: 10.1136/bmjopen-2023-073455 (PMC10806764; doi:10.1136/bmjopen-2023-073455), 2024-01-22
Supplement: bmjopen-2023-073455.draft_revisions.pdf [file bmjopen-2023-073455.draft_revisions.pdf]

# BMJ Open

BMJ Open is committed to open peer review. As part of this commitment we make the peer review history of every article we publish publicly available.

When an article is published we post the peer reviewers' comments and the authors' responses online. We also post the versions of the paper that were used during peer review. These are the versions that the peer review comments apply to.

The versions of the paper that follow are the versions that were submitted during the peer review process. They are not the versions of record or the final published versions. They should not be cited or distributed as the published version of this manuscript.

BMJ Open is an open access journal and the full, final, typeset and author-corrected version of record of the manuscript is available on our site with no access controls, subscription charges or pay-per-view fees (<http://bmjopen.bmj.com>).

If you have any questions on BMJ Open's open peer review process please email [info.bmjopen@bmj.com](mailto:info.bmjopen@bmj.com)

# BMJ Open

## Predicting incident heart failure from population-based nationwide electronic health records: protocol for a model development and validation study

|                               |                                                                                                                                                                                                                                                                                                                                                                                                                                                                                                                                                            |
|-------------------------------|------------------------------------------------------------------------------------------------------------------------------------------------------------------------------------------------------------------------------------------------------------------------------------------------------------------------------------------------------------------------------------------------------------------------------------------------------------------------------------------------------------------------------------------------------------|
| Journal:                      | <i>BMJ Open</i>                                                                                                                                                                                                                                                                                                                                                                                                                                                                                                                                            |
| Manuscript ID                 | bmjopen-2023-073455                                                                                                                                                                                                                                                                                                                                                                                                                                                                                                                                        |
| Article Type:                 | Protocol                                                                                                                                                                                                                                                                                                                                                                                                                                                                                                                                                   |
| Date Submitted by the Author: | 06-Mar-2023                                                                                                                                                                                                                                                                                                                                                                                                                                                                                                                                                |
| Complete List of Authors:     | Nakao, Yoko; University of Leeds, Nadarajah, Ramesh; University of Leeds, Leeds Institute for Data Analytics; University of Leeds, Leeds Institute of Cardiovascular and Metabolic Medicine<br>Shuweihdi, Farag; University of Leeds, Leeds Institute of Health Sciences<br>Nakao, Kazuhiro; University of Leeds<br>Fuat, Ahmet; Carmel Medical Practice,<br>Moore, Jim; Bishop's Cleeve, Stroke Road Surgery<br>Bates, Christopher; The Phoenix Partnership Leeds Ltd<br>Wu, Jianhua; Queen Mary University of London<br>Gale, Chris; University of Leeds |
| Keywords:                     | Heart failure < CARDIOLOGY, Primary Care < Primary Health Care, Primary Prevention                                                                                                                                                                                                                                                                                                                                                                                                                                                                         |
|                               |                                                                                                                                                                                                                                                                                                                                                                                                                                                                                                                                                            |

SCHOLARONE™  
Manuscripts

**Title**

Predicting incident heart failure from population-based nationwide electronic health records:  
protocol for a model development and validation study

**Authors**

Yoko M Nakao<sup>1,2\*</sup>, Ramesh Nadarajah<sup>1,2,3\*</sup>, Farag Shuweihdi<sup>1</sup>, Kazuhiro Nakao<sup>1,2,4</sup>, Ahmet  
Fuat<sup>5</sup>, Jim Moore<sup>6</sup>, Chris Bates<sup>7</sup>, Jianhua Wu<sup>1,8</sup>, Chris P Gale<sup>1,2,3</sup>

**Affiliations:**

<sup>1</sup> Leeds Institute for Cardiovascular and Metabolic Medicine, University of Leeds, UK

<sup>2</sup> Leeds Institute of Data Analytics, University of Leeds, UK

<sup>3</sup> Department of Cardiology, Leeds Teaching Hospitals NHS Trust, Leeds, UK

<sup>4</sup> Department of Cardiovascular Medicine, National Cerebral and Cardiovascular Center,  
Suita, Japan

<sup>5</sup> Carmel Medical Practice, Darlington & School of Medicine, Pharmacy and Health, Durham  
University, Durham, UK

<sup>6</sup> Stoke Road Surgery, Bishop's Cleeve, Cheltenham, UK

<sup>7</sup> The Phoenix Partnership, Leeds, UK

<sup>8</sup> Department of Biostatistics and Health Data Science, Queen Mary University of London,  
London, UK

\*The first two authors are joint first authors.

**Corresponding author**

Yoko M Nakao

Leeds Institute for Cardiovascular and Metabolic Medicine

University of Leeds

6 Clarendon Way

1  
2  
3 Leeds, UK

4  
5 LS2 9DA

6  
7 Tel +44 (0) 113 343 3241

8  
9 Email Y.Nakao@leeds.ac.uk

10  
11 Twitter @YokoMNakao

12  
13  
14  
15  
16 **Word count**

17  
18 2861 words

19  
20  
21  
22 **Keywords**

23  
24 Heart failure; Prediction; Electronic health records; Primary care; Screening; Prevention

## **Abstract**

### Introduction

Heart failure (HF) is increasingly common and associated with excess morbidity, mortality and healthcare costs. Treatment of HF can alter the disease trajectory and reduce clinical events in HF. However, many cases of HF remain undetected until presentation with more advanced symptoms, often requiring hospitalisation. Earlier identification and treatment of HF could reduce downstream healthcare impact, but predicting incident HF is challenging and statistical models are limited by performance and scalability in routine clinical practice. A HF prediction model developed in nationwide electronic health records (EHRs) could provide a scalable solution.

### Methods and analysis

We will investigate a range of development techniques (including logistic regression, and supervised machine learning methods) on routinely collected primary care EHRs to predict risk of new-onset HF over 1, 5 and 10 years prediction horizons. The Clinical Practice Research Datalink (CPRD)-GOLD dataset will be used for derivation (training and testing) and the CPRD-AURUM dataset for external validation. Both comprise a large, representative population of England linked at patient-level to secondary care and mortality data. The performance of the prediction model will be assessed by discrimination, calibration and clinical utility. We will only use variables routinely accessible in primary care.

### Ethics and dissemination

Permissions for CPRD-GOLD and CPRD-AURUM datasets were obtained from CPRD (ref no: 21\_000324). The CPRD ethical approval committee approved the study. The results will be submitted as a research paper for publication to a peer-reviewed journal and presented at peer-reviewed conferences.

### Trial registration details

1  
2  
3 The study was registered on Clinical Trials.gov (NCT05756127). A systematic review for the  
4  
5 project was registered on PROSPERO (registration number: CRD42022380892).  
6  
7  
8  
9  
10  
11  
12  
13  
14  
15  
16  
17  
18  
19  
20  
21  
22  
23  
24  
25  
26  
27  
28  
29  
30  
31  
32  
33  
34  
35  
36  
37  
38  
39  
40  
41  
42  
43  
44  
45  
46  
47  
48  
49  
50  
51  
52  
53  
54  
55  
56  
57  
58  
59  
60

For peer review only

### Strengths and limitations of this study

- Large and nationwide dataset representative of the UK primary care population.
- Investigation of regression and machine learning techniques for the derivation of a heart failure prediction model for short and long term prediction horizons.
- Candidate variable data types are deliberately limited to ensure widespread applicability of the model given the reality of ‘missing’ data in routinely-collected electronic health records.
- This study is designed to fill an implementation gap to enable electronic health records to provide decision support to primary care physicians.
- The derivation and validation work will be undertaken in datasets collected in the UK; therefore, further validation work may be pursued for international contexts.

## Introduction

An estimated 64.3 million people are living with heart failure (HF) worldwide,<sup>1</sup> and the prevalence of HF is projected to increase.<sup>2</sup> HF is the most common cause of unplanned hospital admissions in older persons, and is associated with reduced quality of life and premature mortality.<sup>3-6</sup> Advances in the treatment of HF have offered improvements in prognosis,<sup>7-9</sup> however, many cases of HF present and are diagnosed and treated late in course of the disease.<sup>10 11</sup> Furthermore reported differences in the way heart failure is diagnosed and managed have changed little in the past decade. Variable access to diagnostic tests, modes of care delivery and non-uniform management approaches persist.<sup>12</sup>

Screening and primary prevention for HF is advocated in international guidelines. In the 2022 AHA/ACC/HFSA Guideline for the Management of Heart Failure, natriuretic peptide-based screening followed by team-based care is included as a Class IIa recommendation.<sup>13</sup> However, the discrimination performance of natriuretic peptides for HF is only moderate (area under the receiver operating characteristic curve [AUROC] 0.60-0.70),<sup>14</sup> and would require an enormous burden of patients to undergo an additional blood test. Moreover, unselected screening for HF is unlikely to return a high yield of cases or be cost effective.<sup>15</sup> Alternative approaches that identify an enriched target population suitable for screening and prevention initiatives are warranted.

In the UK, 98% of the populace are registered in primary care and have electronic health records (EHRs).<sup>16</sup> A decision tool that exploits routinely-collected EHR data across a population to calculate HF risk could offer a scalable, efficient and cost-effective approach to targeting diagnostics for HF.<sup>17</sup> Previous models applicable to community-based EHRs to predict HF risk have been limited. Models have seldom been externally validated,<sup>18 19</sup> which prohibits an understanding of their generalizability. Many have been developed in curated prospective cohort studies, and their performance may not translate to EHR data.<sup>19 20</sup> Others include lab results (e.g. natriuretic peptide measurement),<sup>21</sup> specialist investigations (e.g. cardiac MRI)<sup>22</sup> or observations (e.g. blood pressure and body mass index)<sup>20 23</sup> that are missing in the majority of primary care EHRs and which may limit their scalability and applicability across the population.<sup>24</sup> Predictive models developed using deep learning have yet to



1  
2  
3 report calibration performance, and may be limited in clinical application by explainability.<sup>25</sup>

4  
5 Furthermore, models have either provided risk prediction over short (6 months) or long prediction  
6 horizons (10 years),<sup>19 25</sup> and therefore may not be used to both inform targeting of diagnostics and  
7 primary prevention initiatives.  
8  
9  
10

11  
12  
13 The Clinical Practice Research Datalink (CPRD) is an ongoing primary care database, established in  
14 1987, that comprises anonymised medical records and prescribing data from a network of General  
15 Practices (GPs) across the UK.<sup>25</sup> CPRD undertakes over 900 checks covering the integrity, structure  
16 and format of the daily GP data collection and is an optimal tool for undertaking real-world,  
17 population-based evaluations of health care as well as the development of clinical prediction  
18 models.<sup>26 27</sup>  
19  
20  
21  
22  
23  
24  
25  
26  
27

28 Developing a prediction model for HF from routinely-collected primary care EHR data could offer  
29 several advantages. A model created from widely available data in routinely-collected EHRs could be  
30 translated into clinical practice by being embedded into existing clinical EHRs. Furthermore, a model  
31 embedded in EHRs could give risk prediction for incident HF over the next 1-10 years that is updated  
32 each time an individual's clinical situation changes (age, diagnoses recorded), which more accurately  
33 reflects the dynamic nature of disease pathogenesis and clinical decision making.  
34  
35  
36  
37  
38  
39  
40  
41  
42  
43  
44  
45  
46  
47  
48  
49  
50  
51  
52  
53  
54  
55  
56  
57  
58  
59  
60

### Research Aim

The aim of the study is to develop and validate a model for predicting incident heart failure from national primary care EHRs. Specifically, we wish to develop a model that is widely applicable and scalable in routinely-collected community-based EHRs, test its performance across a range of prediction horizons, and externally validate it in a geographically distinct primary care EHR dataset.

For peer review only

## Methods and analysis

### Data sources and permissions

The derivation dataset for training and testing the model will be the CPRD-GOLD dataset. This is an ongoing primary care database, established in 1987, that comprises anonymised medical records and prescribing data contributed by general practices using Vision software.<sup>26</sup> It contains data for approximately 17.5 million patients, with 30% of contributing practices in England.<sup>26</sup> The included patients are broadly representative of the UK general population regarding age, sex and ethnicity.<sup>26</sup> In order to contribute to the database, general practices and other health centres must meet pre-specified standards for research-quality data ('up-to-standard').<sup>16,28</sup>

To ascertain whether the prediction model is generalisable, we will externally validate its performance in the geographically distinct CPRD-AURUM dataset. This was launched in 2017 and encompasses only practices using EMIS Web software. It contains data for approximately 26.9 million patients and draws on data collected from practices in England only.<sup>29</sup> Any practices which previously contributed to CPRD-GOLD have been removed from the CPRD-GOLD cohort to ensure that these datasets reflect different populations. CPRD undertakes various levels of validation and quality assurance on the daily general practice data collection comprising over 900 checks covering the integrity, structure and format of the data.<sup>29</sup> The included patients are broadly representative of the UK general population regarding age, sex, deprivation and geographical spread.<sup>29</sup>

Recorded information in both datasets includes patients' demography, clinical symptoms, signs, investigations, diagnoses, prescriptions, referrals, behavioural factors and test results entered by clinicians and other practice staff. All clinical information is coded using Read Codes in CPRD-GOLD and SNOMED clinical terms (CT) in CPRD-AURUM.<sup>30,31</sup> In the proposed study, extracted patients will have patient-level data linked to Hospital Episode Statistics (HES) Admitted Patient Care (APC) and Diagnostic Imaging Dataset (DID), Office for National Statistics (ONS) Death Registration, patient-level deprivation and practice-level deprivation to provide a more

1  
2  
3 comprehensive dataset. The CPRD dataset has been used to develop or validate a range of risk  
4 prediction models, including in cardiovascular disease.<sup>27 32</sup>  
5  
6  
7

### 8 9 Patient and Public Involvement

10 Patients and public were not involved in the design of this research. However, we are convening a  
11 Scientific Advisory Board, to include representatives from patients and public involvement groups,  
12 clinical experts, national health system leaders and EHR software providers to provide context advice  
13 on the research, dissemination of results and translation of the findings into clinical practice.  
14  
15  
16  
17  
18  
19

### 20 21 Inclusion and exclusion criteria

22 The study population will comprise all available patients in CPRD-GOLD and CPRD-AURUM  
23 eligible for data linkage and with at least 1-year follow-up in the period between 2 January 1998 and  
24 28 February 2022. Patients will be excluded if they were under 16 years of age at the date of the first  
25 registration in CPRD, diagnosed with HF before 2 January 1998, registered for less than 1 year in  
26 CPRD or ineligible for data linkage.  
27  
28  
29  
30  
31  
32  
33

### 34 35 Outcome ascertainment

36 The models will be developed to predict new onset HF. HF will be defined as the first presence of one  
37 or more of the clinical codes related to HF developed by consensus with clinical members of the  
38 research team. Code lists for HF will include Read codes and SNOMED CT in CPRD datasets, and  
39 the 10th revision of the International Statistical Classification of Diseases and Related Health  
40 Problems (ICD-10) codes in HES APC events and underlying cause of death variable in the ONS  
41 Death Registration data file. The first record of HF within the study period will be taken as the date of  
42 diagnosis (the index date). To that effect, in our analytical cohorts there are about 100,000 HF cases in  
43 CPRD-GOLD and 800,000 HF cases in CPRD-AURUM. Misclassified data can lead to systematic  
44 prediction errors and accuracy of data may vary over time,<sup>32</sup> but CPRD has converted older ICD  
45 codes to the newer version, increasing confidence in their validity. Using incidence density  
46  
47  
48  
49  
50  
51  
52  
53  
54  
55  
56  
57  
58  
59  
60

1  
2  
3 sampling,<sup>34</sup> we will match HF cases by year of birth ( $\pm 5$  years) and sex with up to five controls in the  
4 same practice on the index date without a diagnosis of HF on that date.  
5  
6  
7  
8

### 9 Predictor variables

10 A systematic review is being conducted to identify candidate predictors for inclusion (PROSPERO:  
11 CRD42022380892).<sup>35</sup> The potential predictors will include: age, sex, ethnicity, and all disease  
12 conditions during follow-up. Candidate disease conditions will comprise hospitalised diseases, such  
13 as other cardiovascular diseases, obesity, diabetes mellitus, thyroid disorders, iron deficiency and  
14 anaemia, kidney dysfunction, electrolyte disorders, chronic lung disease, sleep-disordered breathing,  
15 hyperlipidaemia, gout, erectile dysfunction, depression, cancer and infection.<sup>7</sup> Code lists for  
16 predictors will be used from publications if available, otherwise the CPRD code browser will be used  
17 and codes checked by at least two clinicians. The code lists for predictors in GOLD and AURUM will  
18 be adapted from CALIBER and HDR UK repositories or publications. If none are available from  
19 these sources then new code lists developed using the OpenCodelists and checked by at least two  
20 clinicians.  
21  
22  
23  
24  
25  
26  
27  
28  
29  
30  
31  
32  
33

34 For diagnoses if medical codes are absent in a patient record we will assume that the patient does not  
35 have that diagnosis, or that the diagnosis was not considered sufficiently important to have been  
36 recorded by the GP in case of symptoms.<sup>36</sup>  
37  
38  
39  
40  
41  
42

### 43 Sample size

44 To develop a prognostic prediction model, the required sample size may be determined by three  
45 criteria suggested by Riley et al.<sup>37</sup> For example, suppose a maximum of 200 parameters will be  
46 included in the prediction model and the Cox-Snell generalised  $R^2$  is assumed to be 0.01. A total of  
47 377 996 patients will be required to meet Riley's criterion (1) with global shrinkage factor of 0.95;  
48 this sample size also ensures a small absolute difference ( $\Delta < 0.05$ ) in the apparent and adjusted  
49 Nagelkerke  $R^2$  (Riley's criterion (2)) and ensures precise estimate of overall risk with a margin of  
50 error  $< 0.001$  (Riley's criterion (3)). According to the Quality and Outcomes Framework, the  
51 prevalence of HF in England is 0.91%. Given an HF prevalence of 0.91%, only 3439 patients will be  
52  
53  
54  
55  
56  
57  
58  
59  
60

1  
2  
3 expected to develop HF from 377 996 patients. Therefore, the number of patients in the CPRD dataset  
4  
5 with HF will provide sufficient statistical power to develop and validate a prediction model with the  
6  
7 predefined precision and accuracy.  
8  
9

## 10 11 Data analysis plan

### 12 13 *Data pre-processing*

14  
15 The CPRD-GOLD and CPRD-AURUM data will be cleaned and pre-processed for model  
16  
17 development and validation, respectively. Specifically, for patient features with binary values (sex  
18  
19 and disease conditions), 0 and 1 will be mapped to the binary values. Continuous variable (age) will  
20  
21 be kept as continuous.  
22  
23  
24  
25

### 26 27 *Descriptive analysis*

28  
29 We will perform descriptive analyses of all variables and test the statistical difference between cases  
30  
31 and controls using the t-test for normally distributed continuous variables, Wilcoxon rank sum test for  
32  
33 non-normally distributed a continuous variable (age), and Pearson's Chi-squared test for categorical  
34  
35 variables.  
36  
37  
38

### 39 40 *Prediction model development*

41  
42 Our focus is on using the logistic regression model because it offers a more manageable approach for  
43  
44 implementation, interpretation, and training compared to machine learning (ML) algorithms.

45  
46 However, we will compare the performance of the logistic regression model to a broad range of  
47  
48 supervised ML techniques, including random forest, neural network, support vector machine,  
49  
50 discriminants analysis, and naïve Bayes classifier. We will check the assumptions of each ML  
51  
52 method to assess its quality and whether it is appropriate for the data. To examine the comparative  
53  
54 performance of the ML algorithms, we will apply Cochran's Q test, which allows for the evaluation of  
55  
56 multiple MLs. The primary prediction window will set at 1 year.<sup>38</sup> We will also explore prediction  
57  
58 models with the length of the prediction window set at 5 and 10 years.  
59  
60

### *Internal validation*

We will evaluate the model performance using a validation cohort with internal bootstrap validation with 200 samples. The AUROC will be used to evaluate predictive ability (concordance index) with 95% confidence intervals calculated using the DeLong method.<sup>39</sup> Youden's index will be established for the outcome measure as a method of empirically identifying the optimal dichotomous cut-off to assess sensitivity, specificity, positive predictive value and negative predictive value. We will calculate the Brier score, a measure of both discrimination and calibration, by taking the mean squared difference between predicted probabilities and the observed outcome. Calibration will be assessed graphically by plotting predicted HF risk against observed HF incidence at 1, 5, and 10 years. Overall ML performance, including distance between the predicted outcome and actual outcome, will be measured. Decision Curve Analysis will be used to assess whether the predictive model would do more benefit than harm.

Clinical utility will be examined by using net benefit analysis, where the harms and benefits of using a model to guide treatment decisions will be offset to assess the overall consequences of using the FIND-HF model for clinical decision making.<sup>40</sup> The model will be compared at 1 year, 5 years and 10 years with model blind methods of performing echocardiography for all patients, or not performing echo for all patients, regardless of HF risk. We will assess the net benefit across the full range of possible threshold probabilities with a HF risk. A priori we will set a HF risk at 1, 5 and 10 years as being the threshold of clinical interest, to align with the incidence of HF at these time points in routine practice.

The same methods will be employed in subgroups by age (<65 years, ≥65 years; <75 years, ≥75 years), sex (women, men), ethnicity (White, Black, Asian, others and unspecified) and HF phenotype (HF with preserved ejection fraction, HF with reduced ejection fraction) to assess the model's predictive performance in these clinically relevant groups.

### *External validation of model*

1  
2  
3 The CPRD-AURUM dataset will then be used to externally validate the model performance to assess  
4 generalisability. A lack of external validation has hampered the implementation of previous prediction  
5 models for heart failure in routine clinical practice.<sup>41</sup> The prediction model will be applied to each  
6 individual in the external validation cohort to give the predicted probabilities of experiencing HF at 1,  
7 5 and 10 years. Prediction performance will be quantified by calculating the AUROC, Brier score, the  
8 observed to expected ratio, and by using calibration plots, and the same aforementioned clinical utility  
9 and subgroup analysis will be conducted. We will compare the performance against previously  
10 published models for incident HF that have been externally validated and are scalable in EHRs.<sup>42</sup>  
11  
12  
13  
14  
15  
16  
17  
18  
19  
20  
21

## 22 Software

23 All analysis will be conducted through STATA (version 17) and R.  
24  
25  
26  
27

## 28 **Ethics and dissemination**

29 The study has been approved by CPRD (ref no: 21\_000324). Those handling data have completed  
30 University of Leeds information security training. All analyses will be conducted in concordance with  
31 the CPRD study dataset agreement between the Secretary of State for Health and Social Care and the  
32 University of Leeds.  
33  
34  
35  
36  
37  
38  
39  
40

41 The study is informed by the Prognosis Research Strategy (PROGRESS) framework and  
42 recommendations.<sup>43</sup> The subsequent research paper will be submitted for publication in a peer-  
43 reviewed journal and will be written following Transparent Reporting of a multivariable prediction  
44 model for Individual Prognosis or Diagnosis (TRIPOD) reporting guidelines and the CODE-EHR  
45 best-practice framework.<sup>44 45</sup>  
46  
47  
48  
49  
50  
51

52 If the model demonstrates evidence of clinical utility, it could be made readily available through free-  
53 to-use software. The model will be designed to be amenable to in situ updating with new information  
54 so that prediction of an individual's HF risk is updated contemporaneously. The model could be a  
55 built-in tool for use in general practices for the targeted identification of individuals at high risk of  
56  
57  
58  
59  
60



1  
2  
3 developing new-onset HF. Future rigorous prospective study will be needed to assess the clinical  
4 impact and cost-effectiveness of this risk model.<sup>16</sup> At the point when utilisation in clinical practice is  
5 possible, the applicable regulation on medicine devices will be adhered to.<sup>46</sup> When in clinical use, the  
6 model itself could also be reviewed and updated by a pre-specified expert consensus group on an  
7 annual basis after incorporating evidence from post-service utilisation and the curation of more data.  
8  
9  
10  
11  
12  
13  
14  
15  
16  
17  
18  
19  
20  
21  
22  
23  
24  
25  
26  
27  
28  
29  
30  
31  
32  
33  
34  
35  
36  
37  
38  
39  
40  
41  
42  
43  
44  
45  
46  
47  
48  
49  
50  
51  
52  
53  
54  
55  
56  
57  
58  
59  
60

For peer review only

## Conclusions

Heart failure is a common clinical problem with high healthcare burden. A prediction model that may identify in a community setting individuals at higher risk of incident HF could enable targeted investigation and primary prevention to reduce downstream morbidity, mortality and healthcare costs. This study has been designed to develop a widely-applicable and scalable HF-risk prediction model within existing healthcare structures to maximise the opportunity to translate this research for patient benefit.

For peer review only

### **Data availability statement**

Patient-level data will not be made available.

### **Ethics Approval**

Permissions for CPRD-GOLD and CPRD-AURUM datasets were obtained from CPRD (ref no: 21\_000324). The CPRD ethical approval committee approved the study.

### **Patient consent for publication**

Not required.

### **Contributions**

CPG conceived the concept and JW, YMN, FS and RN planned the analysis. YMN wrote the first draft, with contributions from all authors. RN amended the draft after comments from all co-authors. All authors approved the final version and jointly take responsibility for the decision to submit the manuscript to be considered for publication.

### **Funding**

This work was supported by the Japan Research Foundation for Healthy Aging. The funder of the study has no role in study design, data collection, data analysis, data interpretation, or writing the report.

### **Conflict of Interests**

YMN reports a study grant from Bayer, outside the submitted work. JM reports personal fees from Bayer. He is the President of the Primary Care Cardiovascular Society. CPG reports personal fees from AstraZeneca, Amgen, Bayer, Boehringer-Ingelheim, Daiichi Sankyo, Vifor, Pharma, Menarini, Wondr Medical, Raisio Group and Oxford University Press. He has received educational and research grants from BMS, Abbott inc., the British Heart Foundation, National Institute of Health Research,

1  
2  
3 Horizon 2020, and from the European Society of Cardiology, outside the submitted work. All other  
4  
5 authors declare no competing interests.  
6  
7  
8  
9  
10  
11  
12  
13  
14  
15  
16  
17  
18  
19  
20  
21  
22  
23  
24  
25  
26  
27  
28  
29  
30  
31  
32  
33  
34  
35  
36  
37  
38  
39  
40  
41  
42  
43  
44  
45  
46  
47  
48  
49  
50  
51  
52  
53  
54  
55  
56  
57  
58  
59  
60

For peer review only

## References

1. Global, regional, and national incidence, prevalence, and years lived with disability for 354 diseases and injuries for 195 countries and territories, 1990-2017: a systematic analysis for the Global Burden of Disease Study 2017. *Lancet* 2018;392(10159):1789-858. doi: 10.1016/s0140-6736(18)32279-7 [published Online First: 2018/11/30]
2. Conrad N, Judge A, Tran J, et al. Temporal trends and patterns in heart failure incidence: a population-based study of 4 million individuals. *The Lancet* 2018;391(10120):572-80.
3. Simmonds R, Glogowska M, McLachlan S, et al. Unplanned admissions and the organisation-al management of heart failure: a multicentre ethnographic, qualitative study. *BMJ open* 2015;5(10):e007522.
4. Mohd Ghazi A, Teoh CK, Abdul Rahim AA. Patient profiles on outcomes in patients hospital-ized for heart failure: a 10-year history of the Malaysian population. *ESC Heart Fail* 2022;9(4):2664-75. doi: 10.1002/ehf2.13992 [published Online First: 20220602]
5. Conrad N, Judge A, Canoy D, et al. Temporal Trends and Patterns in Mortality After Incident Heart Failure: A Longitudinal Analysis of 86 000 Individuals. *JAMA Cardiol* 2019;4(11):1102-11. doi: 10.1001/jamacardio.2019.3593 [published Online First: 2019/09/04]
6. Taylor CJ, Ordóñez-Mena JM, Roalfe AK, et al. Trends in survival after a diagnosis of heart failure in the United Kingdom 2000-2017: population based cohort study. *BMJ* 2019;364:l223. doi: 10.1136/bmj.l223
7. McDonagh TA, Metra M, Adamo M, et al. 2021 ESC Guidelines for the diagnosis and treat-ment of acute and chronic heart failure: Developed by the Task Force for the diagnosis and treatment of acute and chronic heart failure of the European Society of Cardiology (ESC) With the special contribution of the Heart Failure Association (HFA) of the ESC. *European Heart Journal* 2021;42(36):3599-726. doi: 10.1093/eurheartj/ehab368

- 1  
2  
3 8. Mebazaa A, Davison B, Chioncel O, et al. Safety, tolerability and efficacy of up-titration of  
4 guideline-directed medical therapies for acute heart failure (STRONG-HF): a multinational, open-  
5 label, randomised, trial. *The Lancet* 2022;400(10367):1938-52. doi: 10.1016/S0140-6736(22)02076-1  
6  
7  
8  
9
- 10 9. Tromp J, Ouwerkerk W, van Veldhuisen DJ, et al. A Systematic Review and Network Meta-  
11 Analysis of Pharmacological Treatment of Heart Failure With Reduced Ejection Fraction. *JACC*  
12 *Heart Fail* 2022;10(2):73-84. doi: 10.1016/j.jchf.2021.09.004 [published Online First: 20211208]  
13  
14  
15  
16
- 17 10. Kwok CS, Burke H, McDermott S, et al. Missed Opportunities in the Diagnosis of Heart Failure:  
18 Evaluation of Pathways to Determine Sources of Delay to Specialist Evaluation. *Curr Heart Fail Rep*  
19 2022;19(4):247-53. doi: 10.1007/s11897-022-00551-4 [published Online First: 20220606]  
20  
21  
22  
23
- 24 11. Conrad N, Judge A, Tran J, et al. Temporal trends and patterns in heart failure incidence: a  
25 population-based study of 4 million individuals. *Lancet* 2018;391(10120):572-80. doi:  
26 10.1016/s0140-6736(17)32520-5 [published Online First: 2017/11/28]  
27  
28  
29  
30
- 31 12. Hancock HC, Close H, Fuat A, et al Barriers to accurate diagnosis and effective management of  
32 heart failure have not changed in the past 10 years: a qualitative study and national survey *BMJ Open*  
33 2014;4:e003866. doi: 10.1136/bmjopen-2013-003866  
34  
35  
36  
37  
38
- 39 13. Heidenreich PA, Bozkurt B, Aguilar D, et al. 2022 AHA/ACC/HFSA Guideline for the Man-  
40 agement of Heart Failure: A Report of the American College of Cardiology/American Heart  
41 Association Joint Committee on Clinical Practice Guidelines. *Circulation* 2022;145(18):e895-e1032.  
42 doi: 10.1161/cir.0000000000001063 [published Online First: 20220401]  
43  
44  
45  
46  
47
- 48 14. Bhalla V, Isakson S, Bhalla MA, et al. Diagnostic ability of B-type natriuretic peptide and  
49 impedance cardiography: testing to identify left ventricular dysfunction in hypertensive patients. *Am J*  
50 *Hypertens* 2005;18(S2):73S-81S.  
51  
52  
53  
54
- 55 15. Don-Wauchope AC, Santaguida PL, McKelvie R, et al. Prediction of clinical outcomes using B-  
56 type natriuretic peptides in the general population: a systematic review. *Heart Fail Rev*  
57 2014;19(4):541-51. doi: 10.1007/s10741-014-9446-7  
58  
59  
60

- 1  
2  
3 16. Herrett E, Gallagher AM, Bhaskaran K, et al. Data Resource Profile: Clinical Practice Re-search  
4 Datalink (CPRD). *Int J Epidemiol* 2015;44(3):827-36. doi: 10.1093/ije/dyv098 [published Online  
5 First: 2015/06/08]  
6  
7  
8  
9  
10 17. Olsen CR, Mentz RJ, Anstrom KJ, et al. Clinical applications of machine learning in the diag-  
11 nosis, classification, and prediction of heart failure. *Am Heart J* 2020;229:1-17. doi:  
12 10.1016/j.ahj.2020.07.009 [published Online First: 20200716]  
13  
14  
15  
16  
17 18. Goyal A, Norton CR, Thomas TN, et al. Predictors of incident heart failure in a large insured  
18 population: a one million person-year follow-up study. *Circ Heart Fail* 2010;3(6):698-705.  
19  
20  
21  
22 19. Agarwal SK, Chambless LE, Ballantyne CM, et al. Prediction of incident heart failure in gen-eral  
23 practice: the Atherosclerosis Risk in Communities (ARIC) Study. *Circ Heart Fail* 2012;5(4):422-29.  
24  
25  
26  
27 20. Chahal H, Bluemke DA, Wu CO, et al. Heart failure risk prediction in the Multi-Ethnic Study of  
28 Atherosclerosis. *Heart* 2015;101(1):58-64.  
29  
30  
31  
32 21. Arshi B, van den Berge JC, van Dijk B, et al. Implications of the ACC/AHA risk score for  
33 prediction of heart failure: the Rotterdam Study. *BMC Med* 2021;19(1):1-10.  
34  
35  
36  
37 22. Bradley J, Schelbert EB, Bonnett LJ, et al. Predicting hospitalisation for heart failure and death in  
38 patients with, or at risk of, heart failure before first hospitalisation: a retrospec-tive model  
39 development and external validation study. *The Lancet Digital Health* 2022;4(6):e445-e54.  
40  
41  
42  
43 23. Brouwers FP, van Gilst WH, Damman K, et al. Clinical risk stratification optimizes value of  
44 biomarkers to predict new-onset heart failure in a community-based cohort. *Circ Heart Fail*  
45 2014;7(5):723-31.  
46  
47  
48  
49  
50  
51 24. Nadarajah R, Wu J, Hogg D, et al. Prediction of short-term atrial fibrillation risk using prima-ry  
52 care electronic health records. *Heart* 2023  
53  
54  
55  
56  
57  
58  
59  
60

- 1  
2  
3 25. Rao S, Li Y, Ramakrishnan R, et al. An explainable Transformer-based deep learning model for  
4 the prediction of incident heart failure. *IEEE Journal of Biomedical and Health In-formatics*  
5 2022;26(7):3362-72.  
6  
7  
8  
9  
10 26. Herrett E, Gallagher AM, Bhaskaran K, et al. Data resource profile: clinical practice research  
11 datalink (CPRD). *Int J Epidemiol* 2015;44(3):827-36.  
12  
13  
14  
15 27. Nadarajah R, Wu J, Frangi AF, et al. Predicting patient-level new-onset atrial fibrillation from  
16 population-based nationwide electronic health records: protocol of FIND-AF for devel-oping a  
17 precision medicine prediction model using artificial intelligence. *BMJ Open* 2021;11(11):e052887.  
18 doi: 10.1136/bmjopen-2021-052887 [published Online First: 20211102]  
19  
20  
21  
22  
23  
24 28. Herrett E, Thomas SL, Schoonen WM, et al. Validation and validity of diagnoses in the Gen-eral  
25 Practice Research Database: a systematic review. *British journal of clinical pharma-cology*  
26 2010;69(1):4-14.  
27  
28  
29  
30  
31 29. Wolf A, Dedman D, Campbell J, et al. Data resource profile: Clinical Practice Research Data-link  
32 (CPRD) Aurum. *International Journal of Epidemiology* 2019;48(6):1740-40g. doi:  
33 10.1093/ije/dyz034  
34  
35  
36  
37  
38  
39 30. Chisholm J. The Read clinical classification. *BMJ: British Medical Journal* 1990;300(6732):1092.  
40  
41  
42 31. SNOMED clinical terms: overview of the development process and project status. Proceed-ings of  
43 the AMIA Symposium; 2001. American Medical Informatics Association.  
44  
45  
46  
47 32. Hippisley-Cox J, Coupland C, Brindle P. Development and validation of QRISK3 risk pre-diction  
48 algorithms to estimate future risk of cardiovascular disease: prospective cohort study. *bmj* 2017;357  
49  
50  
51  
52 33. Ehrenstein V, Nielsen H, Pedersen AB, et al. Clinical epidemiology in the era of big data: new  
53 opportunities, familiar challenges. *Clinical epidemiology* 2017;9:245.  
54  
55  
56  
57  
58  
59  
60



- 1  
2  
3 34. Etminan M. Pharmacoepidemiology II: the nested case-control study--a novel approach in  
4 pharmacoepidemiologic research. *Pharmacotherapy* 2004;24(9):1105-9. doi:  
5 10.1592/phco.24.13.1105.38083 [published Online First: 2004/10/06]  
6  
7  
8  
9  
10 35. McDonagh TA, Metra M, Adamo M, et al. 2021 ESC Guidelines for the diagnosis and treat-ment  
11 of acute and chronic heart failure: Developed by the Task Force for the diagnosis and treatment of  
12 acute and chronic heart failure of the European Society of Cardiology (ESC) With the special  
13 contribution of the Heart Failure Association (HFA) of the ESC. *Eur Heart J* 2021;42(36):3599-726.  
14  
15  
16  
17  
18  
19 36. Elwenspoek MM, O'Donnell R, Jackson J, et al. Development and external validation of a clinical  
20 prediction model to aid coeliac disease diagnosis in primary care: An observa-tional study.  
21 *EClinicalMedicine* 2022;46:101376.  
22  
23  
24  
25  
26  
27 37. Riley RD, Snell KI, Ensor J, et al. Minimum sample size for developing a multivariable pre-  
28 diction model: PART II-binary and time-to-event outcomes. *Statistics in medicine* 2019;38(7):1276-  
29 96.  
30  
31  
32  
33  
34 38. Chen R, Stewart WF, Sun J, et al. Recurrent Neural Networks for Early Detection of Heart Failure  
35 From Longitudinal Electronic Health Record Data: Implications for Temporal Modeling With  
36 Respect to Time Before Diagnosis, Data Density, Data Quantity, and Data Type. *Circ Cardiovasc*  
37 *Qual Outcomes* 2019;12(10):e005114. doi: 10.1161/circoutcomes.118.005114 [published Online  
38 First: 20191015]  
39  
40  
41  
42  
43  
44  
45 39. DeLong ER, DeLong DM, Clarke-Pearson DL. Comparing the areas under two or more cor-  
46 related receiver operating characteristic curves: a nonparametric approach. *Biometrics*  
47 1988;44(3):837-45.  
48  
49  
50  
51  
52 40. Vickers AJ, Van Calster B, Steyerberg EW. Net benefit approaches to the evaluation of pre-  
53 diction models, molecular markers, and diagnostic tests. *BMJ* 2016;352  
54  
55  
56  
57  
58  
59  
60

- 1  
2  
3 41. Banerjee A, Chen S, Fatemifar G, et al. Machine learning for subtype definition and risk pre-  
4 diction in heart failure, acute coronary syndromes and atrial fibrillation: systematic re-view of validity  
5 and clinical utility. *BMC Medicine* 2021;19(1):85. doi: 10.1186/s12916-021-01940-7  
6  
7  
8  
9  
10 42. Bavishi A, Bruce M, Ning H, et al. Predictive accuracy of heart failure-specific risk equations in  
11 an electronic health record-based cohort. *Circ Heart Fail* 2020;13(11):e007462.  
12  
13  
14  
15 43. Steyerberg EW, Moons KG, van der Windt DA, et al. Prognosis Research Strategy (PRO-GRESS)  
16 3: prognostic model research. *PLoS medicine* 2013;10(2):e1001381.  
17  
18  
19  
20 44. Collins GS, Reitsma JB, Altman DG, et al. Transparent reporting of a multivariable prediction  
21 model for individual prognosis or diagnosis (TRIPOD): the TRIPOD statement. The TRIPOD Group.  
22 *Circulation* 2015;131(2):211-9. doi: 10.1161/circulationaha.114.014508 [published Online First:  
23 20150105]  
24  
25  
26  
27  
28  
29 45. Kotecha D, Asselbergs FW, Achenbach S, et al. CODE-EHR best practice framework for the use  
30 of structured electronic healthcare records in clinical research. *BMJ* 2022;378  
31  
32  
33  
34 46. Tarricone R, Ciani O, Torbica A, et al. Lifecycle evidence requirements for high-risk im-plantable  
35 medical devices: a European perspective. *Expert Review of Medical Devices* 2020;17(10):993-1006.  
36  
37  
38  
39  
40  
41  
42  
43  
44  
45  
46  
47  
48  
49  
50  
51  
52  
53  
54  
55  
56  
57  
58  
59  
60

Missing in the majority of primary care EHRs

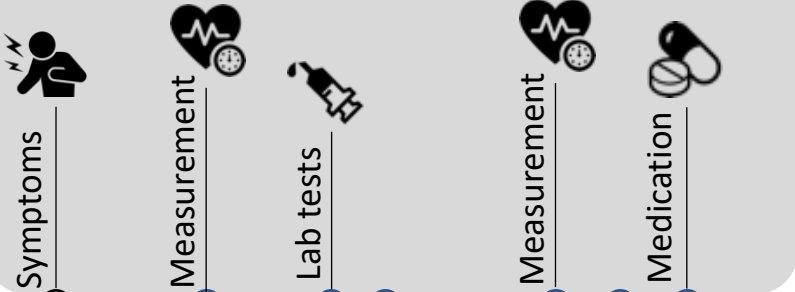

Limit their scalability and applicability across the population

# FIND-HF

Scalable, efficient and cost-effective approach to targeting HF prediction

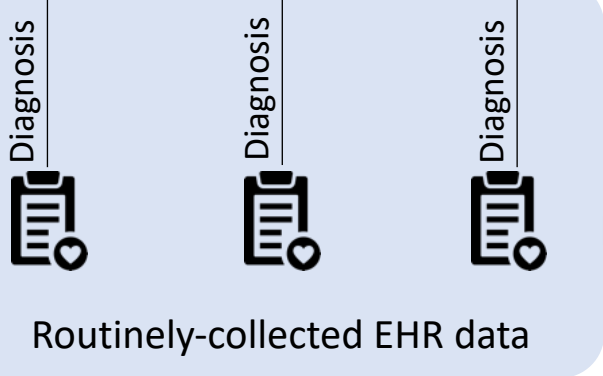

## Data representation

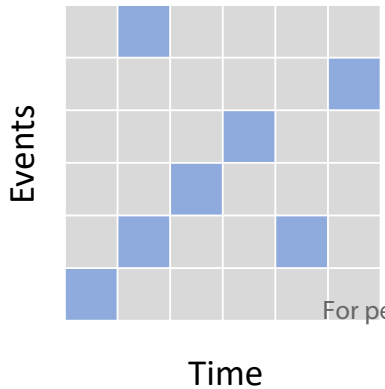

## Development techniques

Logistic regression and ML methods

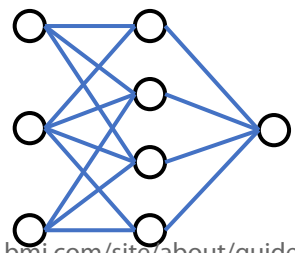

## Prediction of HF incidence

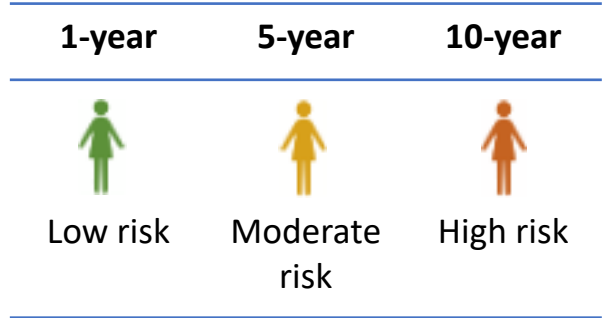

# BMJ Open

## Predicting incident heart failure from population-based nationwide electronic health records: protocol for a model development and validation study

|                                 |                                                                                                                                                                                                                                                                                                                                                                                                                                                                                                                                                               |
|---------------------------------|---------------------------------------------------------------------------------------------------------------------------------------------------------------------------------------------------------------------------------------------------------------------------------------------------------------------------------------------------------------------------------------------------------------------------------------------------------------------------------------------------------------------------------------------------------------|
| Journal:                        | <i>BMJ Open</i>                                                                                                                                                                                                                                                                                                                                                                                                                                                                                                                                               |
| Manuscript ID                   | bmjopen-2023-073455.R1                                                                                                                                                                                                                                                                                                                                                                                                                                                                                                                                        |
| Article Type:                   | Protocol                                                                                                                                                                                                                                                                                                                                                                                                                                                                                                                                                      |
| Date Submitted by the Author:   | 17-Jun-2023                                                                                                                                                                                                                                                                                                                                                                                                                                                                                                                                                   |
| Complete List of Authors:       | Nakao, Yoko; University of Leeds,<br>Nadarajah, Ramesh; University of Leeds, Leeds Institute for Data Analytics; University of Leeds, Leeds Institute of Cardiovascular and Metabolic Medicine<br>Shuweihdi, Farag; University of Leeds, Leeds Institute of Health Sciences<br>Nakao, Kazuhiro; University of Leeds<br>Fuat, Ahmet; Carmel Medical Practice,<br>Moore, Jim; Bishop's Cleeve, Stroke Road Surgery<br>Bates, Christopher; The Phoenix Partnership Leeds Ltd<br>Wu, Jianhua; Queen Mary University of London<br>Gale, Chris; University of Leeds |
| <b>Primary Subject Heading</b>: | Cardiovascular medicine                                                                                                                                                                                                                                                                                                                                                                                                                                                                                                                                       |
| Secondary Subject Heading:      | Epidemiology                                                                                                                                                                                                                                                                                                                                                                                                                                                                                                                                                  |
| Keywords:                       | Heart failure < CARDIOLOGY, Primary Care < Primary Health Care, Primary Prevention                                                                                                                                                                                                                                                                                                                                                                                                                                                                            |
|                                 |                                                                                                                                                                                                                                                                                                                                                                                                                                                                                                                                                               |

SCHOLARONE™  
Manuscripts

**Title**

Predicting incident heart failure from population-based nationwide electronic health records: protocol for a model development and validation study

**Authors**

Yoko M Nakao<sup>1,2,3\*</sup>, Ramesh Nadarajah<sup>1,2,4\*</sup>, Farag Shuweihdi<sup>1</sup>, Kazuhiro Nakao<sup>1,2,5</sup>, Ahmet Fuat<sup>5</sup>, Jim Moore<sup>6</sup>, Chris Bates<sup>7</sup>, Jianhua Wu<sup>1,8</sup>, Chris P Gale<sup>1,2,4</sup>

**Affiliations:**

<sup>1</sup> Leeds Institute for Cardiovascular and Metabolic Medicine, University of Leeds, UK

<sup>2</sup> Leeds Institute of Data Analytics, University of Leeds, UK

<sup>3</sup> Department of Pharmacoepidemiology, Kyoto University Graduate School of Medicine and Public Health, Kyoto, Japan.

<sup>4</sup> Department of Cardiology, Leeds Teaching Hospitals NHS Trust, Leeds, UK

<sup>5</sup> Department of Cardiovascular Medicine, National Cerebral and Cardiovascular Center, Suita, Japan

<sup>6</sup> Carmel Medical Practice, Darlington & School of Medicine, Pharmacy and Health, Durham University, Durham, UK

<sup>7</sup> Stoke Road Surgery, Bishop's Cleeve, Cheltenham, UK

<sup>8</sup> The Phoenix Partnership, Leeds, UK

<sup>9</sup> Department of Biostatistics and Health Data Science, Queen Mary University of London, London, UK

\*The first two authors are joint first authors.

**Corresponding author**

Yoko M Nakao

Leeds Institute for Cardiovascular and Metabolic Medicine

1  
2  
3 University of Leeds  
4

5 6 Clarendon Way  
6

7 Leeds, UK  
8

9 LS2 9DA  
10

11 Tel +44 (0) 113 343 3241  
12

13 Email Y.Nakao@leeds.ac.uk  
14

15 Twitter @YokoMNakao  
16  
17

18  
19  
20 **Word count**

21 2867 words  
22  
23

24  
25  
26 **Keywords**  
27

28 Heart failure; Prediction; Electronic health records; Primary care; Screening; Prevention  
29  
30  
31  
32  
33  
34  
35  
36  
37  
38  
39  
40  
41  
42  
43  
44  
45  
46  
47  
48  
49  
50  
51  
52  
53  
54  
55  
56  
57  
58  
59  
60

## **Abstract**

### Introduction

Heart failure (HF) is increasingly common and associated with excess morbidity, mortality and healthcare costs. Treatment of HF can alter the disease trajectory and reduce clinical events in HF. However, many cases of HF remain undetected until presentation with more advanced symptoms, often requiring hospitalisation. Predicting incident HF is challenging and statistical models are limited by performance and scalability in routine clinical practice. A HF prediction model implementable in nationwide electronic health records (EHRs) could enable targeted diagnostics to enable earlier identification of HF.

### Methods and analysis

We will investigate a range of development techniques (including logistic regression, and supervised machine learning methods) on routinely collected primary care EHRs to predict risk of new-onset HF over 1, 5 and 10 years prediction horizons. The Clinical Practice Research Datalink (CPRD)-GOLD dataset will be used for derivation (training and testing) and the CPRD-AURUM dataset for external validation. Both comprise large cohorts of patients, representative of the population of England in terms of age, sex, and ethnicity. Primary care records are linked at patient-level to secondary care and mortality data. The performance of the prediction model will be assessed by discrimination, calibration and clinical utility. We will only use variables routinely accessible in primary care.

### Ethics and dissemination

Permissions for CPRD-GOLD and CPRD-AURUM datasets were obtained from CPRD (ref no: 21\_000324). The CPRD ethical approval committee approved the study. The results will be submitted as a research paper for publication to a peer-reviewed journal and presented at peer-reviewed conferences.

### Trial registration details

1  
2  
3 The study was registered on Clinical Trials.gov (NCT 05756127). A systematic review for the  
4  
5 project was registered on PROSPERO (registration number: CRD42022380892).  
6  
7  
8  
9  
10  
11  
12  
13  
14  
15  
16  
17  
18  
19  
20  
21  
22  
23  
24  
25  
26  
27  
28  
29  
30  
31  
32  
33  
34  
35  
36  
37  
38  
39  
40  
41  
42  
43  
44  
45  
46  
47  
48  
49  
50  
51  
52  
53  
54  
55  
56  
57  
58  
59  
60

For peer review only



### Strengths and limitations of this study

- Large and nationwide dataset representative of the UK primary care population.
- Investigation of regression and machine learning techniques for the derivation of a prediction model for incident heart failure in the short and long term.
- Candidate variable data types are deliberately limited to ensure widespread applicability of the model given the reality of ‘missing’ data in routinely-collected electronic health records.
- This study is designed to fill an implementation gap to enable electronic health records to provide decision support to primary care physicians.
- The derivation and validation work will be undertaken in datasets collected in the UK; therefore, further validation work may be pursued for international contexts.

## Introduction

An estimated 64.3 million people are living with heart failure (HF) worldwide,<sup>1</sup> and the prevalence of HF is projected to increase.<sup>2</sup> HF is the most common cause of unplanned hospital admissions in older persons, and is associated with reduced quality of life and premature mortality.<sup>3-6</sup> Advances in the treatment of HF have offered improvements in prognosis,<sup>7-9</sup> however, many cases of HF present and are diagnosed and treated late in course of the disease.<sup>2,10</sup>

International guidelines define four stages of HF: Stage A HF (at-risk for HF), Stage B HF (pre-HF; structural heart disease without symptoms), Stage C HF (symptomatic HF) and Stage D HF (advanced HF).<sup>7,11</sup> Mortality increases with progression through the stages. Accordingly, guidelines recommend initiatives to identify individuals with Stage A and B HF as evidence supports that the onset of symptomatic HF can be delayed or prevented by targeting modifiable risk factors.<sup>12</sup>

In the UK, 98% of the populace are registered in primary care and have electronic health records (EHRs).<sup>13</sup> A decision tool that exploits routinely-collected EHR data across a population to calculate HF risk could offer a scalable, efficient and cost-effective approach to identifying individuals with Stage A/B HF.<sup>14</sup> Previous models applicable to community-based EHRs to predict HF risk have been limited. Models have seldom been externally validated,<sup>15,16</sup> which prohibits an understanding of their generalizability. Many have been developed in curated prospective cohort studies, and their performance may not translate to EHR data.<sup>16,17</sup> Others include laboratory results (e.g. natriuretic peptide measurement),<sup>18</sup> specialist investigations (e.g. cardiac magnetic resonance [CMR])<sup>19</sup> or observations (e.g. blood pressure and body mass index)<sup>17,20</sup> that are missing in the majority of primary care EHRs and which may limit their scalability and applicability across the population.<sup>21</sup> Predictive models developed using deep learning have yet to report calibration performance, and may be limited in clinical application by explainability.<sup>22</sup> Furthermore, models have either provided risk prediction over short (6 months) or long prediction horizons (10 years),<sup>16,22</sup> and therefore may not be used to both inform targeting of diagnostics and primary prevention initiatives.

1  
2  
3 The Clinical Practice Research Datalink (CPRD) is an ongoing primary care database, established in  
4  
5 1987, that comprises anonymised medical records and prescribing data from a network of General  
6  
7 Practices (GPs) across the UK.<sup>13</sup> CPRD undertakes over 900 checks covering the integrity, structure  
8  
9 and format of the daily GP data collection and is an optimal tool for undertaking real-world,  
10  
11 population-based evaluations of health care as well as the development of clinical prediction  
12  
13 models.<sup>13 23</sup>  
14  
15  
16  
17

18 Developing a prediction model for HF from routinely-collected primary care EHR data could offer  
19  
20 several advantages. A model created from widely available data in routinely-collected EHRs could be  
21  
22 translated into clinical practice by being embedded into existing clinical EHRs. Furthermore, a model  
23  
24 embedded in EHRs could give risk prediction for incident HF over the next 1-10 years that is updated  
25  
26 each time an individual's clinical situation changes (age, diagnoses recorded), which more accurately  
27  
28 reflects the dynamic nature of disease pathogenesis and clinical decision making.  
29  
30  
31  
32  
33  
34  
35  
36  
37  
38  
39  
40  
41  
42  
43  
44  
45  
46  
47  
48  
49  
50  
51  
52  
53  
54  
55  
56  
57  
58  
59  
60

### Research Aim

The aim of the study is to develop and validate a model for predicting incident heart failure from national primary care EHRs. Specifically, we wish to develop a model that is widely applicable and scalable in routinely-collected community-based EHRs, test its performance across a range of prediction horizons, and externally validate it in a geographically distinct primary care EHR dataset.

For peer review only

## Methods and analysis

### Data sources and permissions

The derivation dataset for training and testing the model will be the CPRD-GOLD dataset. This is an ongoing primary care database, established in 1987, that comprises anonymised medical records and prescribing data contributed by general practices using Vision software.<sup>13</sup> It contains data for approximately 17.5 million patients, with 30% of contributing practices in England.<sup>13</sup> The included patients are broadly representative of the UK general population regarding age, sex and ethnicity.<sup>13</sup> In order to contribute to the database, general practices and other health centres must meet pre-specified standards for research-quality data ('up-to-standard').<sup>13 24</sup>

To ascertain whether the prediction model is generalisable, we will externally validate its performance in the geographically distinct CPRD-AURUM dataset. This was launched in 2017 and encompasses only practices using EMIS Web software. It contains data for approximately 26.9 million patients and draws on data collected from practices in England only.<sup>25</sup> Any practices which previously contributed to CPRD-GOLD have been removed from the CPRD-GOLD cohort to ensure that these datasets reflect different populations. CPRD undertakes various levels of validation and quality assurance on the daily general practice data collection comprising over 900 checks covering the integrity, structure and format of the data.<sup>25</sup> The included patients are broadly representative of the UK general population regarding age, sex, deprivation and geographical spread.<sup>25</sup>

There is the possibility that patients may transfer from a practice in GOLD to a practice in AURUM or vice versa, but the proportion of transfers is small. In the study we will ensure that the study period starts from registration with a practice and is censored from the date of transfer out. Therefore there is no overlapping period for the same patient in the training/testing set and the validation set.

Recorded information in both datasets includes patients' demography, clinical symptoms, signs, investigations, diagnoses, prescriptions, referrals, behavioural factors and test results entered by clinicians and other practice staff. All clinical information is coded using Read Codes in CPRD-

1  
2  
3 GOLD and SNOMED clinical terms (CT) in CPRD-AURUM.<sup>26 27</sup> In the proposed study, extracted  
4 patients will have patient-level data linked to Hospital Episode Statistics (HES) Admitted Patient Care  
5 (APC) and Diagnostic Imaging Dataset (DID), Office for National Statistics (ONS) Death  
6 Registration, patient-level deprivation and practice-level deprivation to provide a more  
7 comprehensive dataset. The CPRD dataset has been used to develop or validate a range of risk  
8 prediction models, including in cardiovascular disease.<sup>23 28</sup>  
9  
10  
11  
12  
13  
14  
15  
16  
17

### 18 Patient and Public Involvement

19 Patients and public were not involved in the design of this research. However, we are convening a  
20 Scientific Advisory Board, to include representatives from patients and public involvement groups,  
21 clinical experts, national health system leaders and EHR software providers to provide context advice  
22 on the research, dissemination of results and translation of the findings into clinical practice.  
23  
24  
25  
26  
27  
28  
29

### 30 Inclusion and exclusion criteria

31 The study population will comprise all available patients in CPRD-GOLD and CPRD-AURUM  
32 eligible for data linkage and with at least 1-year follow-up in the period between 2 January 1998 and  
33 28 February 2022. Patients will be excluded if they were under 16 years of age at the date of the first  
34 registration in CPRD, diagnosed with HF before 2 January 1998, registered for less than 1 year in  
35 CPRD or ineligible for data linkage.  
36  
37  
38  
39  
40  
41  
42  
43  
44

### 45 Outcome ascertainment

46 The models will be developed to predict new onset HF. HF will be defined as the first presence of one  
47 or more of the clinical codes related to HF developed by consensus with clinical members of the  
48 research team. Code lists for HF will include Read codes and SNOMED CT in CPRD datasets, and  
49 the 10th revision of the International Statistical Classification of Diseases and Related Health  
50 Problems (ICD-10) codes in HES APC events and underlying cause of death variable in the ONS  
51 Death Registration data file. The first record of HF within the study period will be taken as the date of  
52 diagnosis (the index date). To that effect, in our analytical cohorts there are about 100,000 HF cases in  
53  
54  
55  
56  
57  
58  
59  
60

1  
2  
3 CPRD-GOLD and 800,000 HF cases in CPRD-AURUM. Misclassified data can lead to systematic  
4 prediction errors and accuracy of data may vary over time,<sup>29</sup> but CPRD has converted older ICD  
5 codes to the newer version, increasing confidence in their validity. Using incidence density  
6 sampling,<sup>30</sup> we will match HF cases by year of birth ( $\pm 5$  years) and sex with up to five controls in the  
7 same practice on the index date without a diagnosis of HF on that date.  
8  
9  
10  
11  
12  
13  
14  
15

### 16 Predictor variables

17  
18 A systematic review is being conducted to identify candidate predictors for inclusion (PROSPERO:  
19 CRD42022380892). The potential predictors will include: age, sex, ethnicity, and all disease  
20 conditions during follow-up. Candidate disease conditions will comprise hospitalised diseases, such  
21 as other cardiovascular diseases, obesity, diabetes mellitus, thyroid disorders, iron deficiency and  
22 anaemia, kidney dysfunction, electrolyte disorders, chronic lung disease, sleep-disordered breathing,  
23 hyperlipidaemia, gout, erectile dysfunction, depression, cancer and infection.<sup>7</sup> Code lists for  
24 predictors will be used from publications if available, otherwise the CPRD code browser will be used  
25 and codes checked by at least two clinicians. The code lists for predictors in GOLD and AURUM will  
26 be adapted from CALIBER and HDR UK repositories or publications. If none are available from  
27 these sources then new code lists developed using the OpenCodelists and checked by at least two  
28 clinicians.  
29  
30  
31  
32  
33  
34  
35  
36  
37  
38  
39  
40

41 For diagnoses if medical codes are absent in a patient record we will assume that the patient does not  
42 have that diagnosis, or that the diagnosis was not considered sufficiently important to have been  
43 recorded by the GP in case of symptoms.<sup>31</sup> Ethnicity information is routinely collected in the UK  
44 NHS and so has increasingly high completeness,<sup>32</sup> and we will include an 'ethnicity unrecorded'  
45 category where it is un-available because missingness is considered to be informative.<sup>33</sup> Accordingly  
46 we do not expect any missing data for any of the predictor variables in the analytical cohort.  
47  
48  
49  
50  
51  
52  
53  
54  
55

### 56 Sample size

57  
58 To develop a prognostic prediction model, the required sample size may be determined by three  
59 criteria suggested by Riley et al.<sup>34</sup> For example, suppose a maximum of 200 parameters will be  
60

1  
2  
3 included in the prediction model and the Cox-Snell generalised  $R^2$  is assumed to be 0.01. A total of  
4  
5 377 996 patients will be required to meet Riley's criterion (1) with global shrinkage factor of 0.95;  
6  
7 this sample size also ensures a small absolute difference ( $\Delta < 0.05$ ) in the apparent and adjusted  
8  
9 Nagelkerke  $R^2$  (Riley's criterion (2)) and ensures precise estimate of overall risk with a margin of  
10  
11 error  $< 0.001$  (Riley's criterion (3)). According to the Quality and Outcomes Framework, the  
12  
13 prevalence of HF in England is 0.91%. Given an HF prevalence of 0.91%, only 3439 patients will be  
14  
15 expected to develop HF from 377 996 patients. Therefore, the number of patients in the CPRD dataset  
16  
17 with HF will provide sufficient statistical power to develop and validate a prediction model with the  
18  
19 predefined precision and accuracy.  
20  
21  
22  
23

#### 24 Data analysis plan

##### 25 *Data pre-processing*

26  
27 The CPRD-GOLD and CPRD-AURUM data will be cleaned and pre-processed for model  
28  
29 development and validation, respectively. For categorical variables we will address data quality issues  
30  
31 such as inconsistent formatting and encoding errors, ensure categories are properly defined, and  
32  
33 resolve any inconsistencies in their representation to maintain data integrity. For patient features with  
34  
35 binary values (sex and disease conditions), 0 and 1 will be mapped to the binary values. Continuous  
36  
37 variable (age) will be kept as continuous and we will employ statistical techniques to identify  
38  
39 potential outliers (including the use of z-scores and inspection of the distribution of the variables).  
40  
41 Preprocessed patient-level data in CPRD-GOLD will be randomly split into an 80:20 ratio to create  
42  
43 development and internal validation samples using the Mersenne twister pseudorandom number  
44  
45 generator.  
46  
47  
48  
49

##### 50 *Descriptive analysis*

51  
52 We will perform descriptive analyses of all variables and test the statistical difference between cases  
53  
54 and controls using the t-test for normally distributed continuous variables, Wilcoxon rank sum test for  
55  
56  
57  
58  
59  
60



1  
2  
3 non-normally distributed a continuous variable (age), and Pearson's Chi-squared test for categorical  
4  
5 variables , using a p-value  $\leq 0.05$  to represent significance.  
6  
7  
8  
9

### 10 *Prediction model development*

11  
12 Our focus is on using the logistic regression model because it offers a more manageable approach for  
13  
14 implementation, interpretation, and training compared to machine learning (ML) algorithms.

15  
16 However, we will compare the performance of the logistic regression model to a broad range of  
17  
18 supervised ML techniques, including random forest, neural network, support vector machine,  
19  
20 discriminants analysis, and naïve Bayes classifier. We will check the assumptions of each ML  
21  
22 method to assess its quality and whether it is appropriate for the data. To examine the comparative  
23  
24 performance of the ML algorithms, we will apply Cochran's Q test, which allows for the evaluation of  
25  
26 multiple MLs. The primary prediction window will set at 1 year.<sup>35</sup> We will also explore prediction  
27  
28 models with the length of the prediction window set at 5 and 10 years.  
29  
30  
31

### 32 *Internal validation*

33  
34 We will evaluate the model performance using a validation cohort with internal bootstrap validation  
35  
36 with 200 samples. The AUROC will be used to evaluate predictive ability (concordance index) with  
37  
38 95% confidence intervals calculated using the DeLong method.<sup>36</sup> Youden's index will be established  
39  
40 for the outcome measure as a method of empirically identifying the optimal dichotomous cut-off to  
41  
42 assess sensitivity, specificity, positive predictive value and negative predictive value. We will  
43  
44 calculate the Brier score, a measure of both discrimination and calibration, by taking the mean  
45  
46 squared difference between predicted probabilities and the observed outcome. Calibration will be  
47  
48 assessed graphically by plotting predicted HF risk against observed HF incidence at 1, 5, and 10  
49  
50 years. Overall ML performance, including distance between the predicted outcome and actual  
51  
52 outcome, will be measured. Decision Curve Analysis will be used to assesses whether the predictive  
53  
54 model would do more benefit than harm.  
55  
56  
57  
58  
59  
60

1  
2  
3 Clinical utility will be examined by using net benefit analysis, where the harms and benefits of using a  
4 model to guide treatment decisions will be offset to assess the overall consequences of using the  
5 FIND-HF model for clinical decision making.<sup>36</sup> The model will be compared at 1 year, 5 years and 10  
6 years with model blind methods of performing echocardiography for all patients, or not performing  
7 echo for all patients, regardless of HF risk. We will assess the net benefit across the full range of  
8 possible threshold probabilities with a HF risk. A priori we will set a HF risk at 1, 5 and 10 years as  
9 being the threshold of clinical interest, to align with the incidence of HF at these time points in routine  
10 practice.  
11  
12  
13  
14  
15  
16  
17  
18  
19  
20  
21

22 The same methods will be employed in subgroups by age (<65 years, ≥65 years; <75 years, ≥75  
23 years), sex (women, men), ethnicity (White, Black, Asian, others and unspecified) and HF phenotype  
24 (HF with preserved ejection fraction, HF with reduced ejection fraction) to assess the model's  
25 predictive performance in these clinically relevant groups.  
26  
27  
28  
29  
30  
31

### 32 *External validation of model*

33 The CPRD-AURUM dataset will then be used to externally validate the model performance to assess  
34 generalisability. A lack of external validation has hampered the implementation of previous prediction  
35 models for heart failure in routine clinical practice.<sup>37</sup> The prediction model will be applied to each  
36 individual in the external validation cohort to give the predicted probabilities of experiencing HF at 1,  
37 5 and 10 years. Prediction performance will be quantified by calculating the AUROC, Brier score, the  
38 observed to expected ratio, and by using calibration plots, and the same aforementioned clinical utility  
39 and subgroup analysis will be conducted. We will compare the performance against previously  
40 published models for incident HF that have been externally validated and are scalable in EHRs.<sup>38</sup>  
41  
42  
43  
44  
45  
46  
47  
48  
49  
50  
51  
52

### 53 Software

54 All analysis will be conducted through Stata (version 17) and R.  
55  
56  
57  
58  
59  
60

### **Ethics and dissemination**

1  
2  
3 The study has been approved by CPRD (ref no: 21\_000324). Those handling data have completed  
4  
5 University of Leeds information security training. All analyses will be conducted in concordance with  
6  
7 the CPRD study dataset agreement between the Secretary of State for Health and Social Care and the  
8  
9 University of Leeds.  
10

11  
12  
13 The study is informed by the Prognosis Research Strategy (PROGRESS) framework and  
14  
15 recommendations.<sup>39</sup> The subsequent research paper will be submitted for publication in a peer-  
16  
17 reviewed journal and will be written following Transparent Reporting of a multivariable prediction  
18  
19 model for Individual Prognosis or Diagnosis (TRIPOD) reporting guidelines and the CODE-EHR  
20  
21 best-practice framework.<sup>40 41</sup>  
22  
23  
24  
25

26 If the model demonstrates evidence of clinical utility, it could be made readily available through EHR  
27  
28 system providers. As such, each time the model is called within an EHR system the risk score should  
29  
30 be updated with new information so that prediction of an individual's HF risk is updated  
31  
32 contemporaneously. The model could be a built-in tool for use in general practices for the targeted  
33  
34 identification of individuals at high risk of developing new-onset HF. Future rigorous prospective  
35  
36 study will be needed to assess the clinical impact and cost-effectiveness of this risk model.<sup>14</sup> At the  
37  
38 point when utilisation in clinical practice is possible, the applicable regulation on medicine devices  
39  
40 will be adhered to.<sup>41</sup> When in clinical use, the model itself could also be reviewed and updated by a  
41  
42 pre-specified expert consensus group on an annual basis after incorporating evidence from post-  
43  
44 service utilisation and the curation of more data. The model will have to be updated as population  
45  
46 characteristics change, data quality of EHRs improves and new or additional risk factors emerge.  
47  
48  
49  
50  
51  
52  
53  
54  
55  
56  
57  
58  
59  
60

### **Data availability statement**

Patient-level data will not be made available.

### **Ethics Approval**

Permissions for CPRD-GOLD and CPRD-AURUM datasets were obtained from CPRD (ref no: 21\_000324). The CPRD ethical approval committee approved the study.

### **Patient consent for publication**

Not required.

### **Contributions**

CPG conceived the concept and JW, YMN, FS and RN planned the analysis. YMN wrote the first draft, with contributions from all authors. RN amended the draft after comments from all co-authors. All authors approved the final version and jointly take responsibility for the decision to submit the manuscript to be considered for publication.

### **Funding**

This work was supported by the Japan Research Foundation for Healthy Aging. The funder of the study has no role in study design, data collection, data analysis, data interpretation, or writing the report.

### **Conflict of Interests**

YMN reports a study grant from Bayer, outside the submitted work. JM reports personal fees from Bayer. He is the President of the Primary Care Cardiovascular Society. CPG reports personal fees from AstraZeneca, Amgen, Bayer, Boehringer-Ingelheim, Daiichi Sankyo, Vifor, Pharma, Menarini, Wondr Medical, Raisio Group and Oxford University Press. He has received educational and research grants from BMS, Abbott inc., the British Heart Foundation, National Institute of Health Research,

1  
2  
3  
4  
5  
6  
7  
8  
9  
10  
11  
12  
13  
14  
15  
16  
17  
18  
19  
20  
21  
22  
23  
24  
25  
26  
27  
28  
29  
30  
31  
32  
33  
34  
35  
36  
37  
38  
39  
40  
41  
42  
43  
44  
45  
46  
47  
48  
49  
50  
51  
52  
53  
54  
55  
56  
57  
58  
59  
60

Horizon 2020, and from the European Society of Cardiology, outside the submitted work. All other authors declare no competing interests.

For peer review only

## References

1. Global, regional, and national incidence, prevalence, and years lived with disability for 354 diseases and injuries for 195 countries and territories, 1990-2017: a systematic analysis for the Global Burden of Disease Study 2017. *Lancet* 2018;392(10159):1789-858. doi: 10.1016/s0140-6736(18)32279-7 [published Online First: 2018/11/30]
2. Conrad N, Judge A, Tran J, et al. Temporal trends and patterns in heart failure incidence: a population-based study of 4 million individuals. *Lancet* 2018;391(10120):572-80. doi: 10.1016/s0140-6736(17)32520-5 [published Online First: 2017/11/28]
3. Simmonds R, Glogowska M, McLachlan S, et al. Unplanned admissions and the organisational management of heart failure: a multicentre ethnographic, qualitative study. *BMJ Open* 2015;5(10):e007522. doi: 10.1136/bmjopen-2014-007522 [published Online First: 20151019]
4. Mohd Ghazi A, Teoh CK, Abdul Rahim AA. Patient profiles on outcomes in patients hospitalized for heart failure: a 10-year history of the Malaysian population. *ESC Heart Fail* 2022;9(4):2664-75. doi: 10.1002/ehf2.13992 [published Online First: 20220602]
5. Conrad N, Judge A, Canoy D, et al. Temporal Trends and Patterns in Mortality After Incident Heart Failure: A Longitudinal Analysis of 86 000 Individuals. *JAMA Cardiol* 2019;4(11):1102-11. doi: 10.1001/jamacardio.2019.3593 [published Online First: 2019/09/04]
6. Taylor CJ, Ordóñez-Mena JM, Roalfe AK, et al. Trends in survival after a diagnosis of heart failure in the United Kingdom 2000-2017: population based cohort study. *BMJ* 2019;364:l223. doi: 10.1136/bmj.l223
7. McDonagh TA, Metra M, Adamo M, et al. 2021 ESC Guidelines for the diagnosis and treatment of acute and chronic heart failure: Developed by the Task Force for the diagnosis and treatment of acute and chronic heart failure of the European Society of Cardiology (ESC) With the special contribution of the Heart Failure Association (HFA) of the ESC. *European Heart Journal* 2021;42(36):3599-726. doi: 10.1093/eurheartj/ehab368
8. Mebazaa A, Davison B, Chioncel O, et al. Safety, tolerability and efficacy of up-titration of guideline-directed medical therapies for acute heart failure (STRONG-HF): a multinational,

- 1  
2  
3 open-label, randomised, trial. *The Lancet* 2022;400(10367):1938-52. doi: 10.1016/S0140-  
4 6736(22)02076-1
- 5  
6  
7 9. Tromp J, Ouwerkerk W, van Veldhuisen DJ, et al. A Systematic Review and Network Meta-  
8  
9 Analysis of Pharmacological Treatment of Heart Failure With Reduced Ejection Fraction.  
10  
11 *JACC Heart Fail* 2022;10(2):73-84. doi: 10.1016/j.jchf.2021.09.004 [published Online First:  
12  
13 20211208]
- 14  
15 10. Kwok CS, Burke H, McDermott S, et al. Missed Opportunities in the Diagnosis of Heart Failure:  
16  
17 Evaluation of Pathways to Determine Sources of Delay to Specialist Evaluation. *Curr Heart*  
18  
19 *Fail Rep* 2022;19(4):247-53. doi: 10.1007/s11897-022-00551-4 [published Online First:  
20  
21 20220606]
- 22  
23 11. Heidenreich PA, Bozkurt B, Aguilar D, et al. 2022 AHA/ACC/HFSA Guideline for the  
24  
25 Management of Heart Failure: A Report of the American College of Cardiology/American  
26  
27 Heart Association Joint Committee on Clinical Practice Guidelines. *Circulation*  
28  
29 2022;145(18):e895-e1032. doi: 10.1161/cir.0000000000001063 [published Online First:  
30  
31 20220401]
- 32  
33 12. Jafari LA, Suen RM, Khan SS. Refocusing on the Primary Prevention of Heart Failure. *Curr Treat*  
34  
35 *Options Cardiovasc Med* 2020;22(7) doi: 10.1007/s11936-020-00811-3 [published Online  
36  
37 First: 20200529]
- 38  
39 13. Herrett E, Gallagher AM, Bhaskaran K, et al. Data Resource Profile: Clinical Practice Research  
40  
41 Datalink (CPRD). *Int J Epidemiol* 2015;44(3):827-36. doi: 10.1093/ije/dyv098 [published  
42  
43 Online First: 2015/06/08]
- 44  
45 14. Olsen CR, Mentz RJ, Anstrom KJ, et al. Clinical applications of machine learning in the  
46  
47 diagnosis, classification, and prediction of heart failure. *Am Heart J* 2020;229:1-17. doi:  
48  
49 10.1016/j.ahj.2020.07.009 [published Online First: 20200716]
- 50  
51 15. Goyal A, Norton CR, Thomas TN, et al. Predictors of incident heart failure in a large insured  
52  
53 population: a one million person-year follow-up study. *Circ Heart Fail* 2010;3(6):698-705.  
54  
55 doi: 10.1161/circheartfailure.110.938175 [published Online First: 20100826]  
56  
57  
58  
59  
60

- 1  
2  
3 16. Agarwal SK, Chambless LE, Ballantyne CM, et al. Prediction of incident heart failure in general  
4  
5 practice: the Atherosclerosis Risk in Communities (ARIC) Study. *Circ Heart Fail*  
6  
7 2012;5(4):422-9. doi: 10.1161/circheartfailure.111.964841 [published Online First:  
8  
9 20120515]  
10  
11 17. Chahal H, Bluemke DA, Wu CO, et al. Heart failure risk prediction in the Multi-Ethnic Study of  
12  
13 Atherosclerosis. *Heart* 2015;101(1):58-64. doi: 10.1136/heartjnl-2014-305697 [published  
14  
15 Online First: 20141107]  
16  
17 18. Arshi B, van den Berge JC, van Dijk B, et al. Implications of the ACC/AHA risk score for  
18  
19 prediction of heart failure: the Rotterdam Study. *BMC Med* 2021;19(1):43. doi:  
20  
21 10.1186/s12916-021-01916-7 [published Online First: 20210216]  
22  
23 19. Bradley J, Schelbert EB, Bonnett LJ, et al. Predicting hospitalisation for heart failure and death in  
24  
25 patients with, or at risk of, heart failure before first hospitalisation: a retrospective model  
26  
27 development and external validation study. *Lancet Digit Health* 2022;4(6):e445-e54. doi:  
28  
29 10.1016/s2589-7500(22)00045-0 [published Online First: 20220510]  
30  
31 20. Brouwers FP, van Gilst WH, Damman K, et al. Clinical risk stratification optimizes value of  
32  
33 biomarkers to predict new-onset heart failure in a community-based cohort. *Circ Heart Fail*  
34  
35 2014;7(5):723-31. doi: 10.1161/circheartfailure.114.001185 [published Online First:  
36  
37 20140723]  
38  
39 21. Nadarajah R, Wu J, Hogg D, et al. Prediction of short-term atrial fibrillation risk using primary  
40  
41 care electronic health records. *Heart* 2023 doi: 10.1136/heartjnl-2022-322076 [published  
42  
43 Online First: 20230209]  
44  
45 22. Rao S, Li Y, Ramakrishnan R, et al. An Explainable Transformer-Based Deep Learning Model for  
46  
47 the Prediction of Incident Heart Failure. *IEEE J Biomed Health Inform* 2022;26(7):3362-72.  
48  
49 doi: 10.1109/jbhi.2022.3148820 [published Online First: 20220701]  
50  
51 23. Nadarajah R, Wu J, Frangi AF, et al. Predicting patient-level new-onset atrial fibrillation from  
52  
53 population-based nationwide electronic health records: protocol of FIND-AF for developing a  
54  
55 precision medicine prediction model using artificial intelligence. *BMJ Open*  
56  
57  
58  
59  
60



- 2021;11(11):e052887. doi: 10.1136/bmjopen-2021-052887 [published Online First: 20211102]
24. Herrett E, Thomas SL, Schoonen WM, et al. Validation and validity of diagnoses in the General Practice Research Database: a systematic review. *British journal of clinical pharmacology* 2010;69(1):4-14.
25. Wolf A, Dedman D, Campbell J, et al. Data resource profile: Clinical Practice Research Datalink (CPRD) Aurum. *International Journal of Epidemiology* 2019;48(6):1740-40g. doi: 10.1093/ije/dyz034
26. Chisholm J. The Read clinical classification. *BMJ: British Medical Journal* 1990;300(6732):1092.
27. SNOMED clinical terms: overview of the development process and project status. Proceedings of the AMIA Symposium; 2001. American Medical Informatics Association.
28. Hippisley-Cox J, Coupland C, Brindle P. Development and validation of QRISK3 risk prediction algorithms to estimate future risk of cardiovascular disease: prospective cohort study. *bmj* 2017;357
29. Ehrenstein V, Nielsen H, Pedersen AB, et al. Clinical epidemiology in the era of big data: new opportunities, familiar challenges. *Clinical epidemiology* 2017;9:245.
30. Etminan M. Pharmacoepidemiology II: the nested case-control study--a novel approach in pharmacoepidemiologic research. *Pharmacotherapy* 2004;24(9):1105-9. doi: 10.1592/phco.24.13.1105.38083 [published Online First: 2004/10/06]
31. Elwenspoek MMC, O'Donnell R, Jackson J, et al. Development and external validation of a clinical prediction model to aid coeliac disease diagnosis in primary care: An observational study. *eClinicalMedicine* 2022;46 doi: 10.1016/j.eclinm.2022.101376
32. Routen A, Akbari A, Banerjee A, et al. Strategies to record and use ethnicity information in routine health data. *Nat Med* 2022;28(7):1338-42. doi: 10.1038/s41591-022-01842-y
33. Groenwold RHH. Informative missingness in electronic health record systems: the curse of knowing. *Diagn Progn Res* 2020;4:8. doi: 10.1186/s41512-020-00077-0 [published Online First: 20200702]

- 1  
2  
3 34. Riley RD, Snell KI, Ensor J, et al. Minimum sample size for developing a multivariable prediction  
4  
5 model: PART II-binary and time-to-event outcomes. *Statistics in medicine* 2019;38(7):1276-  
6  
7 96.  
8  
9  
10 35. Chen R, Stewart WF, Sun J, et al. Recurrent Neural Networks for Early Detection of Heart Failure  
11  
12 From Longitudinal Electronic Health Record Data: Implications for Temporal Modeling With  
13  
14 Respect to Time Before Diagnosis, Data Density, Data Quantity, and Data Type. *Circ*  
15  
16 *Cardiovasc Qual Outcomes* 2019;12(10):e005114. doi: 10.1161/circoutcomes.118.005114  
17  
18 [published Online First: 20191015]  
19  
20 36. DeLong ER, DeLong DM, Clarke-Pearson DL. Comparing the areas under two or more correlated  
21  
22 receiver operating characteristic curves: a nonparametric approach. *Biometrics*  
23  
24 1988;44(3):837-45.  
25  
26 37. Banerjee A, Chen S, Fatemifar G, et al. Machine learning for subtype definition and risk  
27  
28 prediction in heart failure, acute coronary syndromes and atrial fibrillation: systematic review  
29  
30 of validity and clinical utility. *BMC Medicine* 2021;19(1):85. doi: 10.1186/s12916-021-  
31  
32 01940-7  
33  
34 38. Bavishi A, Bruce M, Ning H, et al. Predictive Accuracy of Heart Failure-Specific Risk Equations  
35  
36 in an Electronic Health Record-Based Cohort. *Circ Heart Fail* 2020;13(11):e007462. doi:  
37  
38 10.1161/circheartfailure.120.007462 [published Online First: 20201023]  
39  
40 39. Steyerberg EW, Moons KG, van der Windt DA, et al. Prognosis Research Strategy (PROGRESS)  
41  
42 3: prognostic model research. *PLoS medicine* 2013;10(2):e1001381.  
43  
44  
45 40. Collins GS, Reitsma JB, Altman DG, et al. Transparent reporting of a multivariable prediction  
46  
47 model for individual prognosis or diagnosis (TRIPOD): the TRIPOD statement. The TRIPOD  
48  
49 Group. *Circulation* 2015;131(2):211-9. doi: 10.1161/circulationaha.114.014508 [published  
50  
51 Online First: 20150105]  
52  
53 41. Kotecha D, Asselbergs FW, Achenbach S, et al. CODE-EHR best-practice framework for the use  
54  
55 of structured electronic health-care records in clinical research. *Lancet Digit Health*  
56  
57 2022;4(10):e757-e64. doi: 10.1016/s2589-7500(22)00151-0 [published Online First:  
58  
59 20220829]  
60

1  
2  
3  
4  
5  
6  
7  
8  
9  
10  
11  
12  
13  
14  
15  
16  
17  
18  
19  
20  
21  
22  
23  
24  
25  
26  
27  
28  
29  
30  
31  
32  
33  
34  
35  
36  
37  
38  
39  
40  
41  
42  
43  
44  
45  
46  
47  
48  
49  
50  
51  
52  
53  
54  
55  
56  
57  
58  
59  
60

For peer review only

1  
2  
3  
4  
5  
6  
7  
8  
9  
10  
11  
12  
13  
14  
15  
16  
17  
18  
19  
20  
21  
22  
23  
24  
25  
26  
27  
28  
29  
30  
31  
32  
33  
34  
35  
36  
37  
38  
39  
40  
41

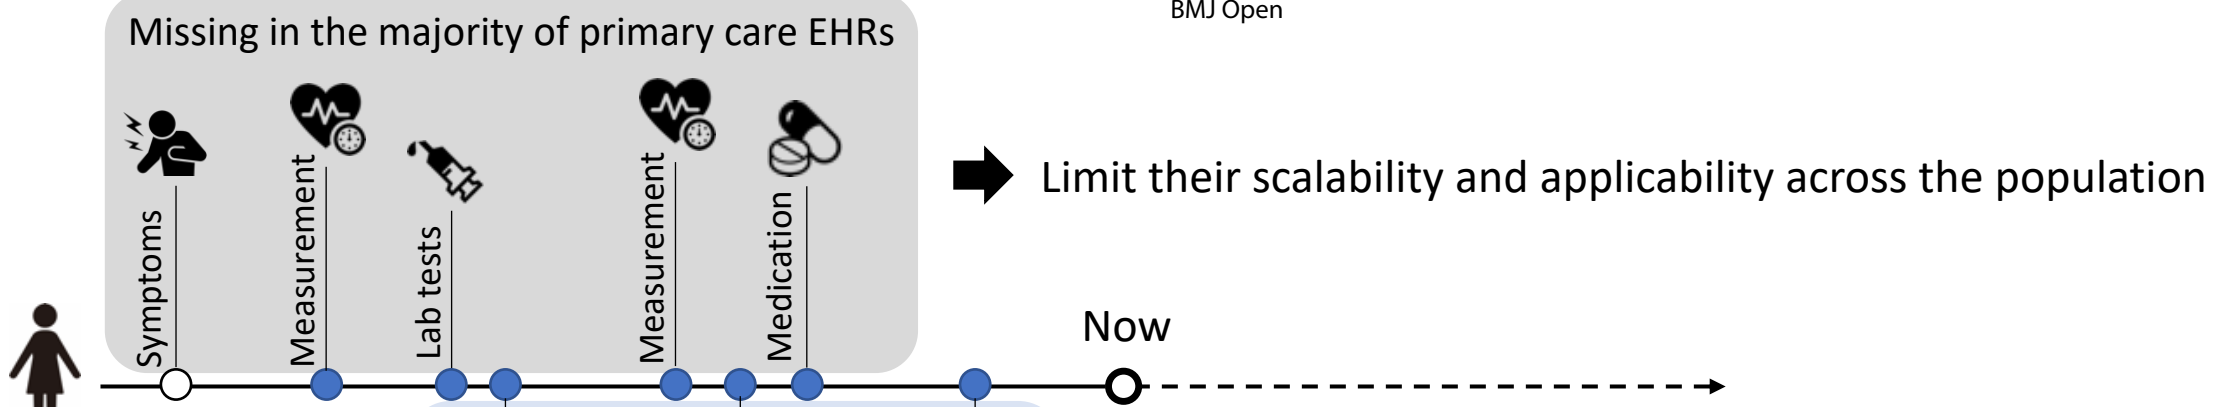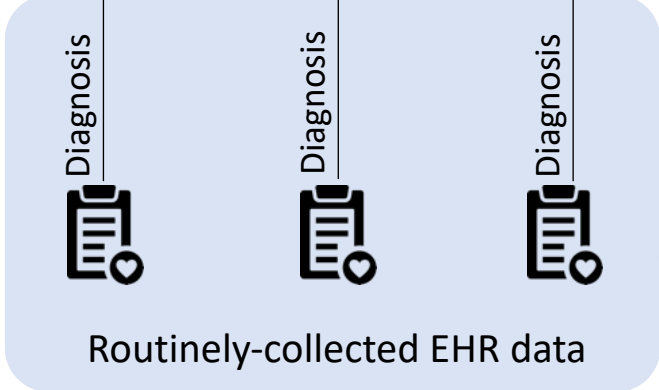

Scalable, efficient and cost-effective approach to targeting HF prediction

# FIND-HF

## Data representation

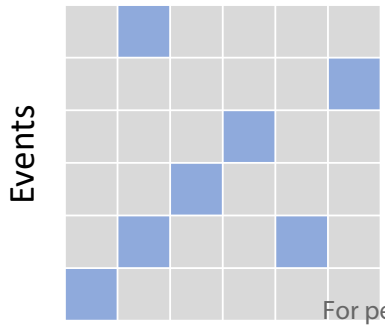

## Development techniques

Logistic regression and ML methods

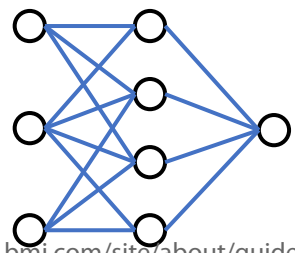

## Prediction of HF incidence



## TRIPOD Checklist: Prediction Model Development and Validation

| Section/Topic                | Item | Checklist Item | Page                                                                                                                                                                                             |
|------------------------------|------|----------------|--------------------------------------------------------------------------------------------------------------------------------------------------------------------------------------------------|
| <b>Title and abstract</b>    |      |                |                                                                                                                                                                                                  |
| Title                        | 1    | D;V            | Identify the study as developing and/or validating a multivariable prediction model, the target population, and the outcome to be predicted.                                                     |
| Abstract                     | 2    | D;V            | Provide a summary of objectives, study design, setting, participants, sample size, predictors, outcome, statistical analysis, results, and conclusions.                                          |
| <b>Introduction</b>          |      |                |                                                                                                                                                                                                  |
| Background and objectives    | 3a   | D;V            | Explain the medical context (including whether diagnostic or prognostic) and rationale for developing or validating the multivariable prediction model, including references to existing models. |
|                              | 3b   | D;V            | Specify the objectives, including whether the study describes the development or validation of the model or both.                                                                                |
| <b>Methods</b>               |      |                |                                                                                                                                                                                                  |
| Source of data               | 4a   | D;V            | Describe the study design or source of data (e.g., randomized trial, cohort, or registry data), separately for the development and validation data sets, if applicable.                          |
|                              | 4b   | D;V            | Specify the key study dates, including start of accrual; end of accrual; and, if applicable, end of follow-up.                                                                                   |
| Participants                 | 5a   | D;V            | Specify key elements of the study setting (e.g., primary care, secondary care, general population) including number and location of centres.                                                     |
|                              | 5b   | D;V            | Describe eligibility criteria for participants.                                                                                                                                                  |
|                              | 5c   | D;V            | Give details of treatments received, if relevant.                                                                                                                                                |
| Outcome                      | 6a   | D;V            | Clearly define the outcome that is predicted by the prediction model, including how and when assessed.                                                                                           |
|                              | 6b   | D;V            | Report any actions to blind assessment of the outcome to be predicted.                                                                                                                           |
| Predictors                   | 7a   | D;V            | Clearly define all predictors used in developing or validating the multivariable prediction model, including how and when they were measured.                                                    |
|                              | 7b   | D;V            | Report any actions to blind assessment of predictors for the outcome and other predictors.                                                                                                       |
| Sample size                  | 8    | D;V            | Explain how the study size was arrived at.                                                                                                                                                       |
| Missing data                 | 9    | D;V            | Describe how missing data were handled (e.g., complete-case analysis, single imputation, multiple imputation) with details of any imputation method.                                             |
| Statistical analysis methods | 10a  | D              | Describe how predictors were handled in the analyses.                                                                                                                                            |
|                              | 10b  | D              | Specify type of model, all model-building procedures (including any predictor selection), and method for internal validation.                                                                    |
|                              | 10c  | V              | For validation, describe how the predictions were calculated.                                                                                                                                    |
|                              | 10d  | D;V            | Specify all measures used to assess model performance and, if relevant, to compare multiple models.                                                                                              |
|                              | 10e  | V              | Describe any model updating (e.g., recalibration) arising from the validation, if done.                                                                                                          |
| Risk groups                  | 11   | D;V            | Provide details on how risk groups were created, if done.                                                                                                                                        |

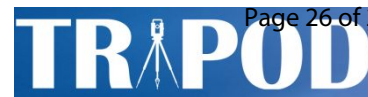

TRIPOD Checklist: Prediction Model Development and Validation

|                            |     |     |                                                                                                                                                                                                       |                                                                                                                                   |
|----------------------------|-----|-----|-------------------------------------------------------------------------------------------------------------------------------------------------------------------------------------------------------|-----------------------------------------------------------------------------------------------------------------------------------|
|                            |     |     |                                                                                                                                                                                                       | Internal validation                                                                                                               |
| Development vs. validation | 12  | V   | For validation, identify any differences from the development data in setting, eligibility criteria, outcome, and predictors.                                                                         | Methods and analysis – Data sources and permissions; Inclusion and exclusion criteria; Outcome ascertainment; Predictor variables |
| <b>Results</b>             |     |     |                                                                                                                                                                                                       |                                                                                                                                   |
| Participants               | 13a | D;V | Describe the flow of participants through the study, including the number of participants with and without the outcome and, if applicable, a summary of the follow-up time. A diagram may be helpful. | N/A                                                                                                                               |
|                            | 13b | D;V | Describe the characteristics of the participants (basic demographics, clinical features, available predictors), including the number of participants with missing data for predictors and outcome.    | N/A                                                                                                                               |
|                            | 13c | V   | For validation, show a comparison with the development data of the distribution of important variables (demographics, predictors and outcome).                                                        | N/A                                                                                                                               |
| Model development          | 14a | D   | Specify the number of participants and outcome events in each analysis.                                                                                                                               | N/A                                                                                                                               |
|                            | 14b | D   | If done, report the unadjusted association between each candidate predictor and outcome.                                                                                                              | N/A                                                                                                                               |
| Model specification        | 15a | D   | Present the full prediction model to allow predictions for individuals (i.e., all regression coefficients, and model intercept or baseline survival at a given time point).                           | N/A                                                                                                                               |
|                            | 15b | D   | Explain how to use the prediction model.                                                                                                                                                              | N/A                                                                                                                               |
| Model performance          | 16  | D;V | Report performance measures (with CIs) for the prediction model.                                                                                                                                      | N/A                                                                                                                               |
| Model-updating             | 17  | V   | If done, report the results from any model updating (i.e., model specification, model performance).                                                                                                   | N/A                                                                                                                               |
| <b>Discussion</b>          |     |     |                                                                                                                                                                                                       |                                                                                                                                   |
| Limitations                | 18  | D;V | Discuss any limitations of the study (such as nonrepresentative sample, few events per predictor, missing data).                                                                                      | N/A                                                                                                                               |
| Interpretation             | 19a | V   | For validation, discuss the results with reference to performance in the development data, and any other validation data.                                                                             | N/A                                                                                                                               |
|                            | 19b | D;V | Give an overall interpretation of the results, considering objectives, limitations, results from similar studies, and other relevant evidence.                                                        | N/A                                                                                                                               |
| Implications               | 20  | D;V | Discuss the potential clinical use of the model and implications for future research.                                                                                                                 | N/A                                                                                                                               |
| <b>Other information</b>   |     |     |                                                                                                                                                                                                       |                                                                                                                                   |
| Supplementary information  | 21  | D;V | Provide information about the availability of supplementary resources, such as study protocol, Web calculator, and data sets.                                                                         | N/A                                                                                                                               |
| Funding                    | 22  | D;V | Give the source of funding and the role of the funders for the present study.                                                                                                                         | Funding                                                                                                                           |

\*Items relevant only to the development of a prediction model are denoted by D, items relating solely to a validation of a prediction model are denoted by V, and items relating to both are denoted D;V. We recommend using the TRIPOD Checklist in conjunction with the TRIPOD Explanation and Elaboration document.
